# Supplementary material for: Equation of state for hard-sphere fluids offering accurate virial coefficients
Source: Royal Society of Chemistry journal article supplement (doi:10.1039/b915002a), 2009-01-01
Supplement: b915002a_addcorr.doc [file b915002a_addcorr.doc]

**ADDITIONS & CORRECTIONS www.rsc.org/pccp | Physical Chemistry Chemical Physics**

**Equation of state for hard-sphere fluids offering accurate virial coefficients**

Jianxiang Tian, Hua Jiang, Yuanxing Gui and A. Mulero

*Phys. Chem. Chem. Phys.*, 2009, **11**, 11213–11218 (DOI: 10.1039/b915002a). ***Amendment published 11th October 2011.***

In Table 2 on page 11216, coefficient *a*0 = 5.881876129 is wrong. The correct value is *a*0 = 8.100015583. This change does not affect any result or discussion in the current paper.

The Royal Society of Chemistry apologises for these errors and any consequent inconvenience to authors and readers.

**Additions and corrections can be viewed online by accessing the original article to which they apply.**
